# Supplementary material for: Transport and Loss of Ring Current Electrons Inside Geosynchronous Orbit During the 17 March 2013 Storm
Source: PubMed Central journal article supplement — J Geophys Res Space Phys. 2019 Feb 1;124(2):915–33. doi: 10.1029/2018JA026031 (PMC6472511; doi:10.1029/2018ja026031), 2019-02-01
Supplement: JGRA-124-915-s001.pdf [file JGRA-124-915-s001.pdf]

**Supporting Information for**  
**“Transport and Loss of Ring Current Electrons Inside Geosynchronous**  
**Orbit during the 17 March 2013 Storm”**

**N. A. Aseev<sup>1,2</sup>, Y. Y. Shprits<sup>1,2,3</sup>, D. Wang<sup>1</sup>, J. Wygant<sup>4</sup>, A. Y. Drozdov<sup>3</sup>,**  
**A. C. Kellerman<sup>3</sup>, G. D. Reeves<sup>5</sup>**

<sup>1</sup>GFZ German Research Centre for Geosciences, Potsdam, Germany

<sup>2</sup>Institute of Physics and Astronomy, University of Potsdam, Potsdam, Germany

<sup>3</sup>University of California Los Angeles, Los Angeles, CA, USA

<sup>4</sup>University of Minnesota, Minneapolis, MN, USA

<sup>5</sup>Los Alamos National Laboratory, Los Alamos, NM, USA

---

Corresponding author: N. A. Aseev, [nikita.aseev@gfz-potsdam.de](mailto:nikita.aseev@gfz-potsdam.de)

- Supporting Figure 1 shows combined HOPE and MagEIS spectrum for the Van Allen Probes A and B. The figure indicates that HOPE and MagEIS data match up well near the energy boundary around 30 keV.

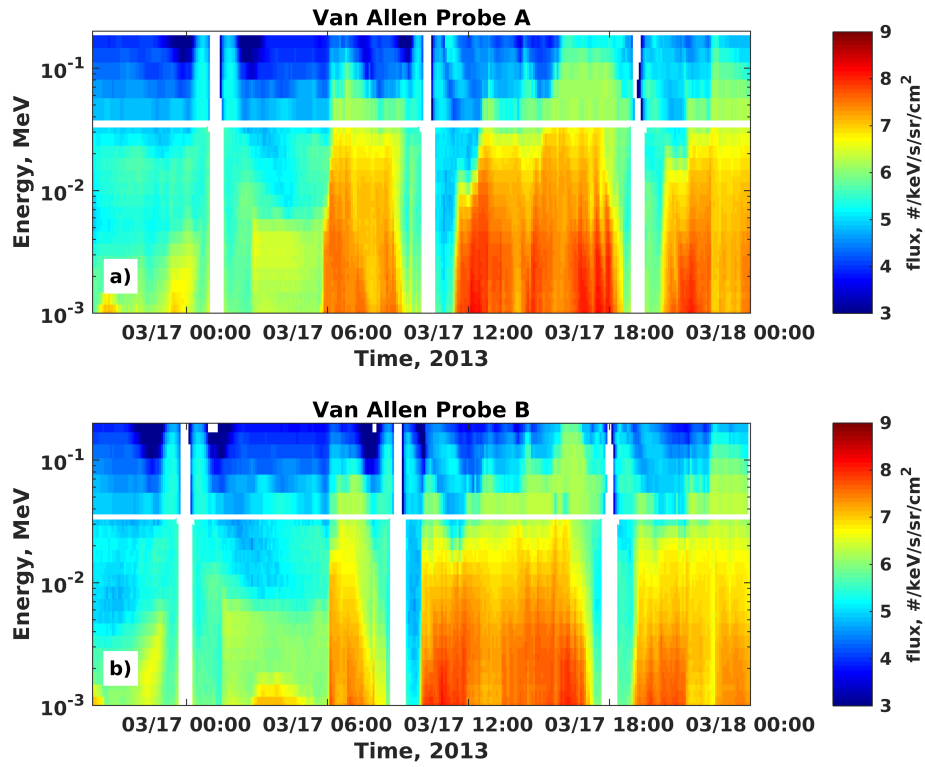

**Figure 1.** Combined HOPE and MagEIS spectrum for  $90^\circ$  local pitch angle for the Van Allen Probes A (a) and B (b). The HOPE data above 30 keV are not shown, and the white horizontal line marks the energy boundary between the instruments.
